# Supplementary material for: Rapid resetting of human peripheral clocks by phototherapy during simulated night shift work
Source: PubMed Central journal article supplement (PMC5701225; doi:10.1038/s41598-017-16429-8), 2017-11-24
Supplement: 41598_2017_16429_MOESM1_ESM.pdf [file 41598_2017_16429_MOESM1_ESM.pdf]

**Rapid resetting of human  
peripheral clocks by  
phototherapy during simulated  
night shift work**

Marc Cuesta, Philippe Boudreau,  
Nicolas Cermakian & Diane B.

Boivin

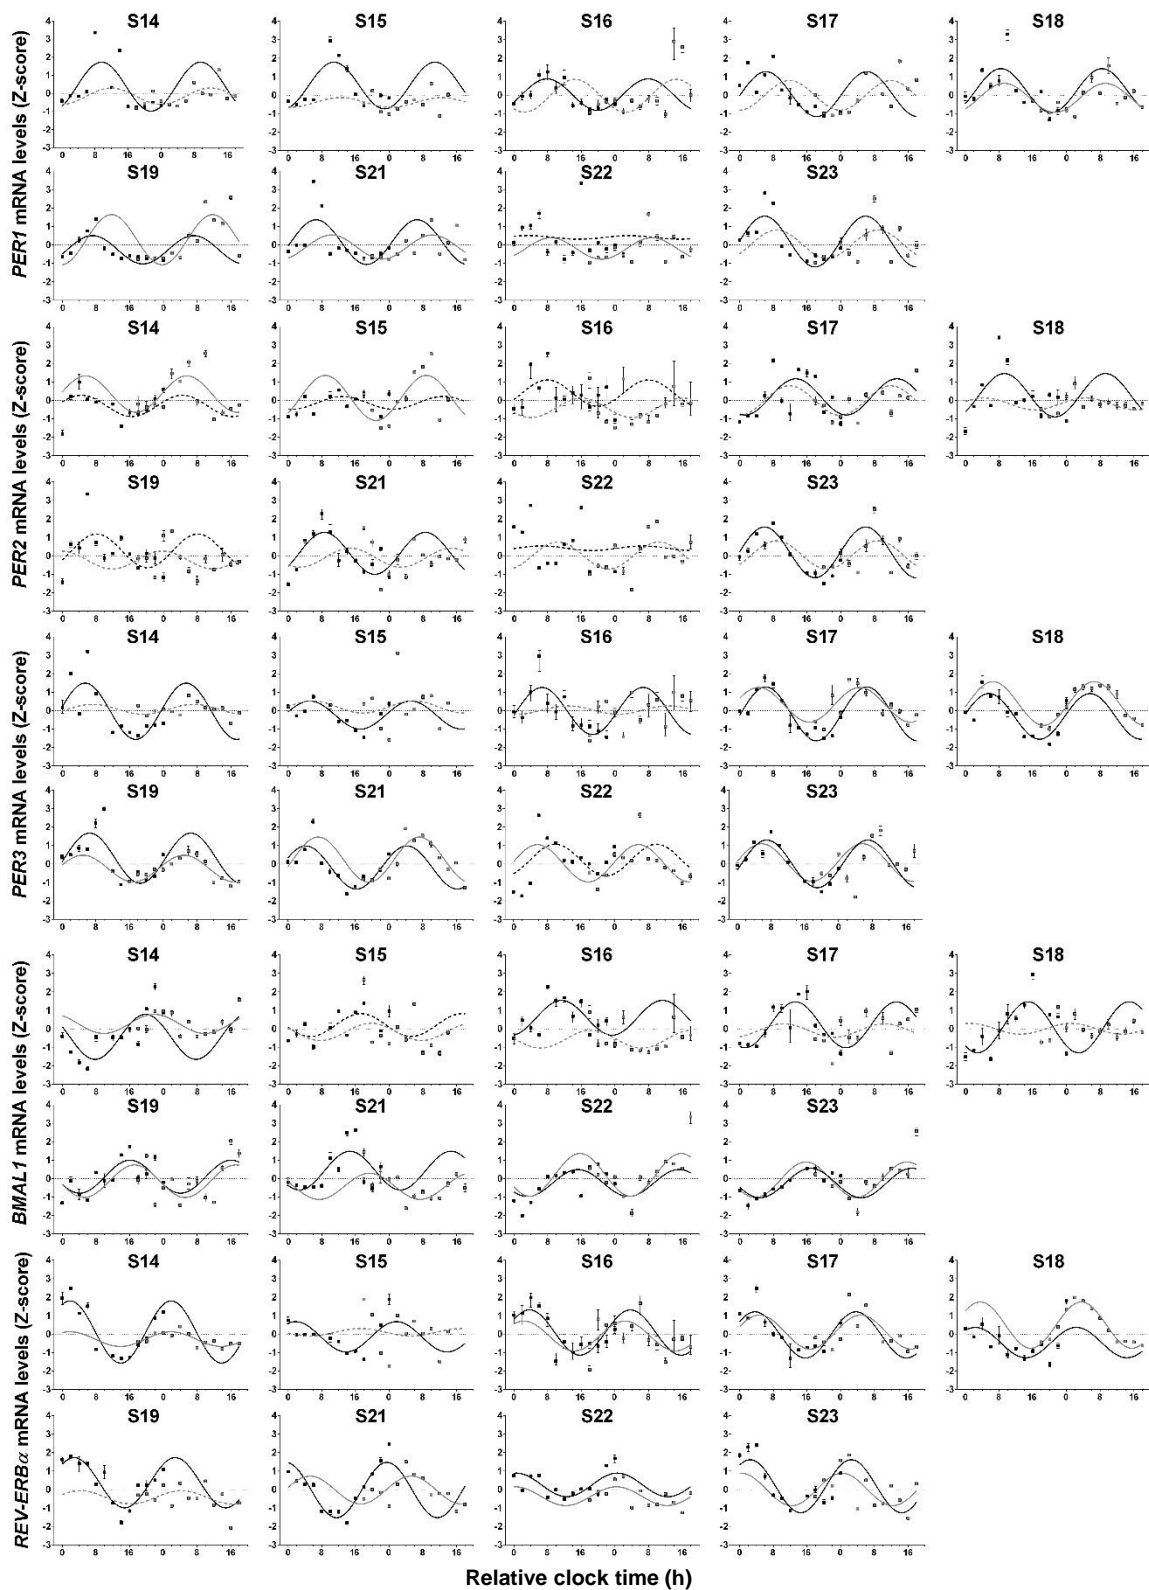

**Figure S1. Individual circadian rhythms of clock gene mRNA expression in PBMCs in baseline and night shift in the control group.** Mean levels ( $\pm$ upper and lower levels) and individual harmonic regressions of *PER1*, *PER2*, *PER3*, *BMAL1* and *REV-ERB $\alpha$*  are given as Z-scores in baseline (black) and following night shift (grey). Bedtimes and wake times were assigned a relative clock time of 0:00 and 8:00, respectively. For visualization purposes, the x-axis represents two 24-h cycles, and harmonic regressions were double plotted (over 48 h). Harmonic regressions are represented by solid lines when statistically significant and by dashed lines when non-significant.

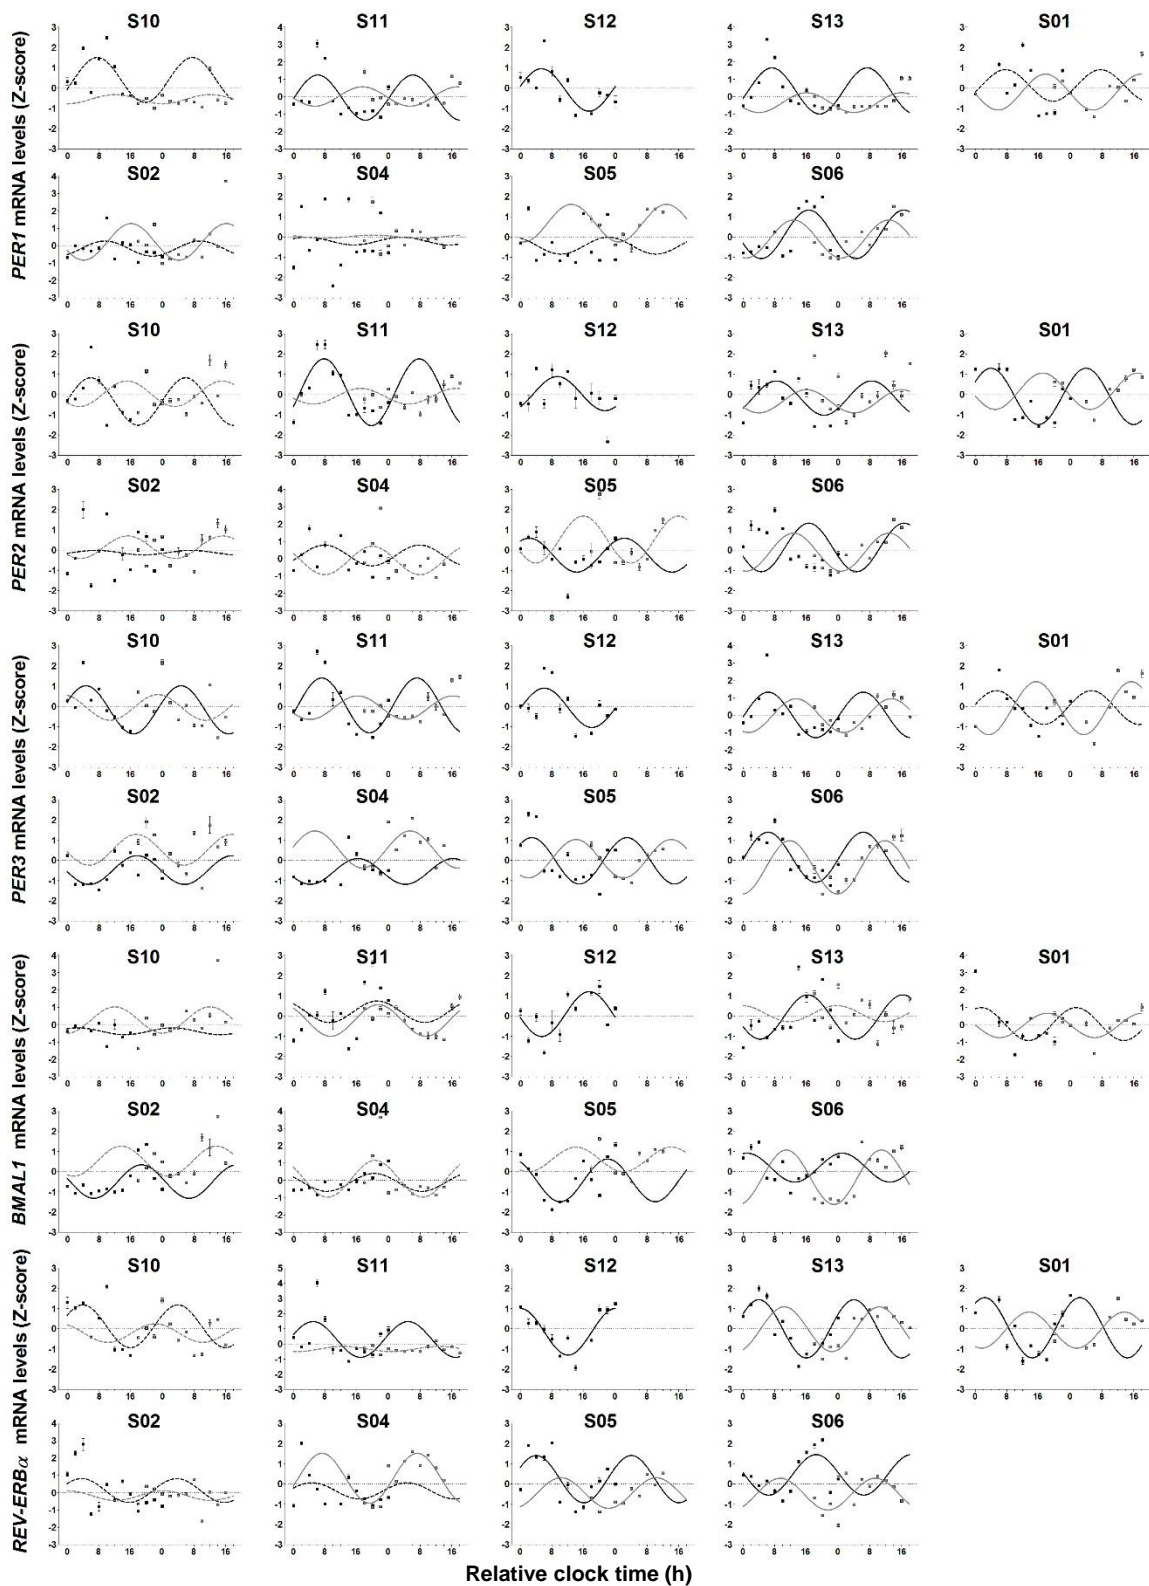

**Figure S2. Individual circadian rhythms of clock genes mRNA expression in PBMCs in baseline and night shift in the bright light group.** Mean levels ( $\pm$ upper and lower levels) and individual harmonic regressions of *PER1*, *PER2*, *PER3*, *BMAL1* and *REV-ERB $\alpha$*  are given as Z-scores in baseline (black) and following night shift (grey). Bedtimes and wake times were assigned a relative clock time of 0:00 and 8:00, respectively. For visualization purposes, the x-axis represents two 24-h cycles, and harmonic regressions were double plotted (over 48 h). Harmonic regressions are represented by solid lines when statistically significant and by dashed lines when non-significant.

**Table S1.** Demographic data

| <b>Subject</b> | <b>Group</b> | <b>Age</b> | <b>BMI</b> | <b>Time in bed</b> | <b>Time out of bed</b> | <b>Chronotype Type</b> | <b>Experimental period</b> |
|----------------|--------------|------------|------------|--------------------|------------------------|------------------------|----------------------------|
| S14            | CTRL         | 21         | 20.4       | 23:57              | 7:59                   | Intermediate           | August 2-7, 2012           |
| S15            | CTRL         | 20         | 19.6       | 22:31              | 6:31                   | Intermediate           | May 15-20, 2013            |
| S16            | CTRL         | 27         | 20.7       | 0:30               | 8:16                   | Intermediate           | May 27-June 1, 2013        |
| S17            | CTRL         | 18         | 20.4       | 23:00              | 7:02                   | Intermediate           | June 11-17, 2013           |
| S18            | CTRL         | 29         | 23.0       | 0:01               | 8:01                   | Intermediate           | June 26-July 1, 2013       |
| S19<br>(woman) | CTRL         | 23         | 23.0       | 0:31               | 8:31                   | Intermediate           | July 12-17, 2013           |
| S20            | CTRL         | 19         | 22.3       | 23:01              | 7:09                   | Moderately Morning     | July 29-August 3, 2013     |
| S21            | CTRL         | 23         | 22.4       | 0:00               | 8:07                   | Intermediate           | July 1-6, 2014             |
| S22            | CTRL         | 22         | 20.9       | 23:40              | 7:47                   | Intermediate           | July 17-22, 2014           |
| S23            | CTRL         | 24         | 21.5       | 23:29              | 7:30                   | Intermediate           | July 30-August 4, 2014     |
| S01            | BL           | 29         | 22.0       | 23:25              | 7:30                   | Moderately Morning     | June 4-9, 2005             |
| S02            | BL           | 18         | 19.9       | 22:01              | 6:04                   | Intermediate           | July 18-23, 2005           |
| S04<br>(woman) | BL           | 22         | 21.2       | 0:00               | 8:01                   | Moderately Morning     | July 25-30, 2005           |
| S05            | BL           | 23         | 23.6       | 23:25              | 7:28                   | Intermediate           | August 3-8, 2005           |
| S06            | BL           | 30         | 23.5       | 23:58              | 8:07                   | Intermediate           | August 11-16, 2005         |
| S10            | BL           | 30         | 21.5       | 0:00               | 8:01                   | Intermediate           | June 3-8, 2012             |
| S11            | BL           | 28         | 23.5       | 22:26              | 6:30                   | Moderately Morning     | June 17-22, 2012           |
| S12            | BL           | 19         | 22.5       | 23:00              | 7:04                   | Moderately Morning     | July 2-7, 2012             |
| S13            | BL           | 22         | 24.5       | 23:01              | 7:02                   | Intermediate           | July 8-13, 2012            |

CTRL: Control group; BL: Bright light group
